# Supplementary material for: Transparent Low Molecular Weight Poly(Ethylene Glycol) Diacrylate-Based Hydrogels as Film Media for Photoswitchable Drugs
Source: PubMed Central journal article supplement (PMC6418822; doi:10.3390/polym9120639), 2017-11-23
Supplement: polymers-09-00639-s001.pdf [file polymers-09-00639-s001.pdf]

# Transparent Low Molecular Weight Poly(Ethylene Glycol) Diacrylate-Based Hydrogels as Film Media for Photoswitchable Drugs

## Electronic supplementary information (ESI)

Théophile Pelras,<sup>a,b,\*</sup> Sarah Glass,<sup>a,†</sup> Tom Scherzer<sup>a</sup>, Christian Elsner,<sup>a</sup> Agnes Schulze,<sup>a,†</sup> and Bernd Abel<sup>a</sup>

a. Leibniz-Institute of Surface Modification, Permoserstraße 15, 04318 Leipzig, Germany

b. Key Center for Polymers and Colloids, School of Chemistry, University of Sydney, NSW 2006, Australia

\*Both authors contributed equally to this publication

† for correspondence: [agnes.schulze@iom-leipzig.de](mailto:agnes.schulze@iom-leipzig.de)

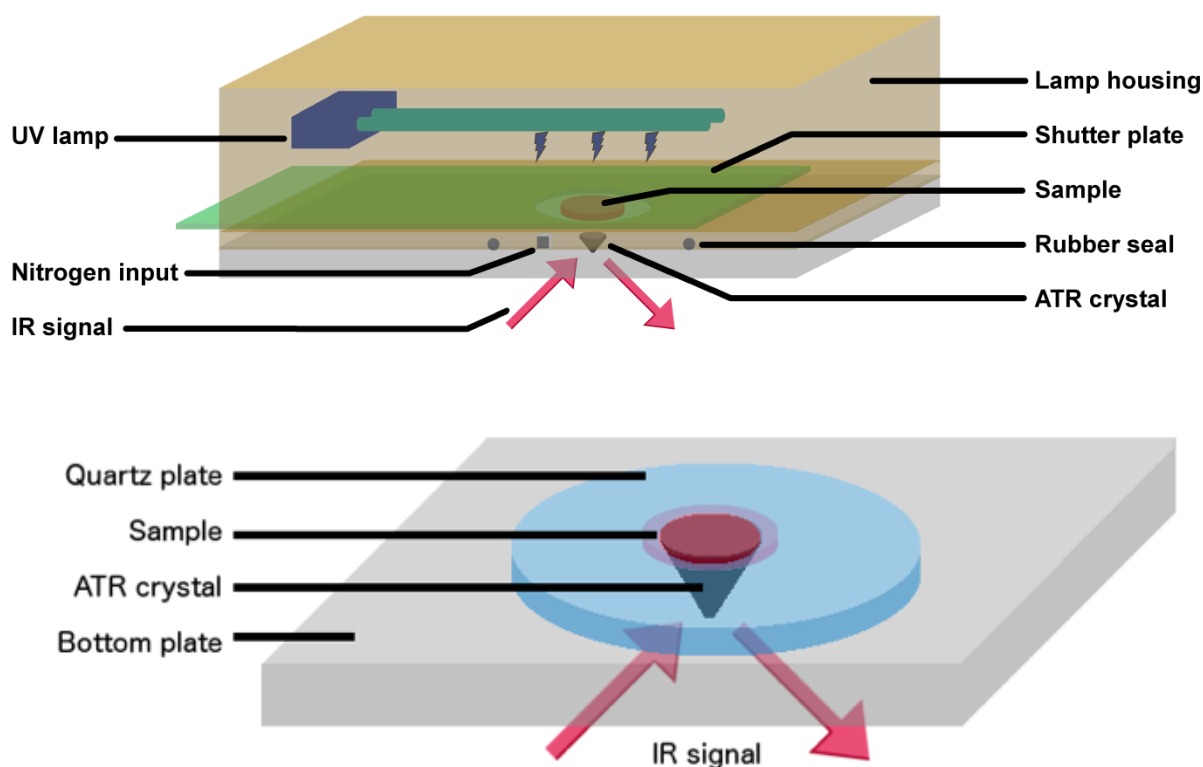

Figure S1: Scheme of the lamp and its irradiation box used for the photopolymerization of the mixtures (top). The scheme shows the irradiation box mounted on the ATR module of the RT-FTIR spectrometer. Detailed view of the sample deposited on the ATR crystal and calibrated using the quartz plate (bottom).

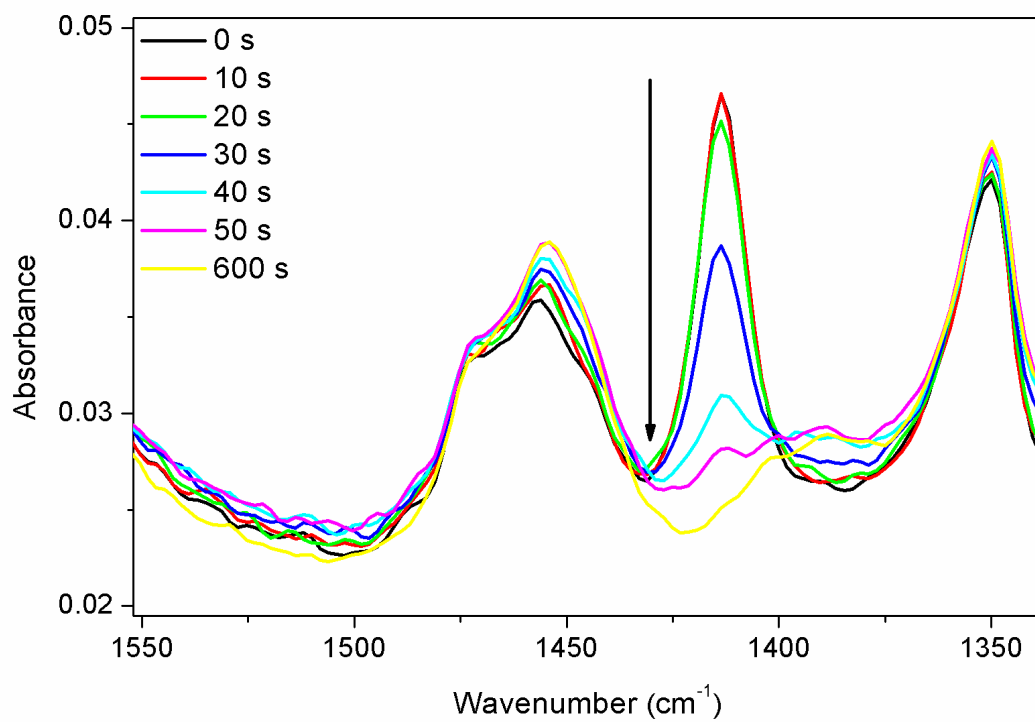

Figure S2: Decrease of the IR band assigned to the =CH<sub>2</sub> deformation vibration of the PEGDA at 1,410 cm<sup>-1</sup> in a hydrogel sample. The formulation containing 0.5 wt%  $\alpha$ -HAP was photopolymerized in air with a light intensity of 12 mW cm<sup>-2</sup> using the UV-A lamp.

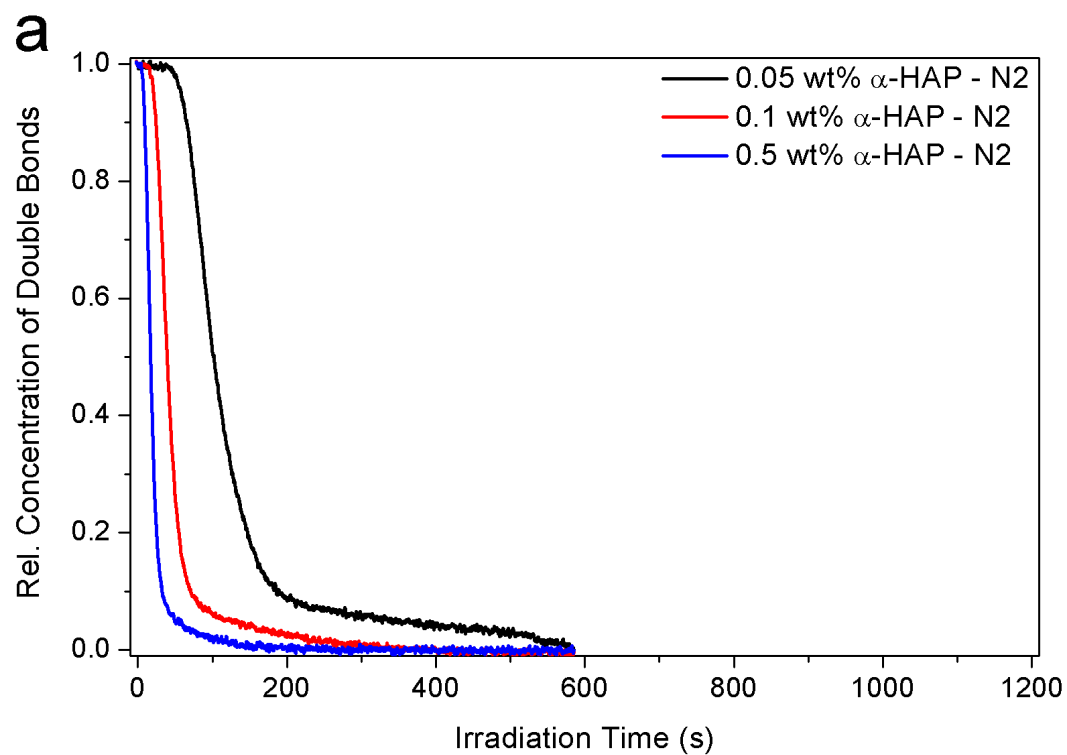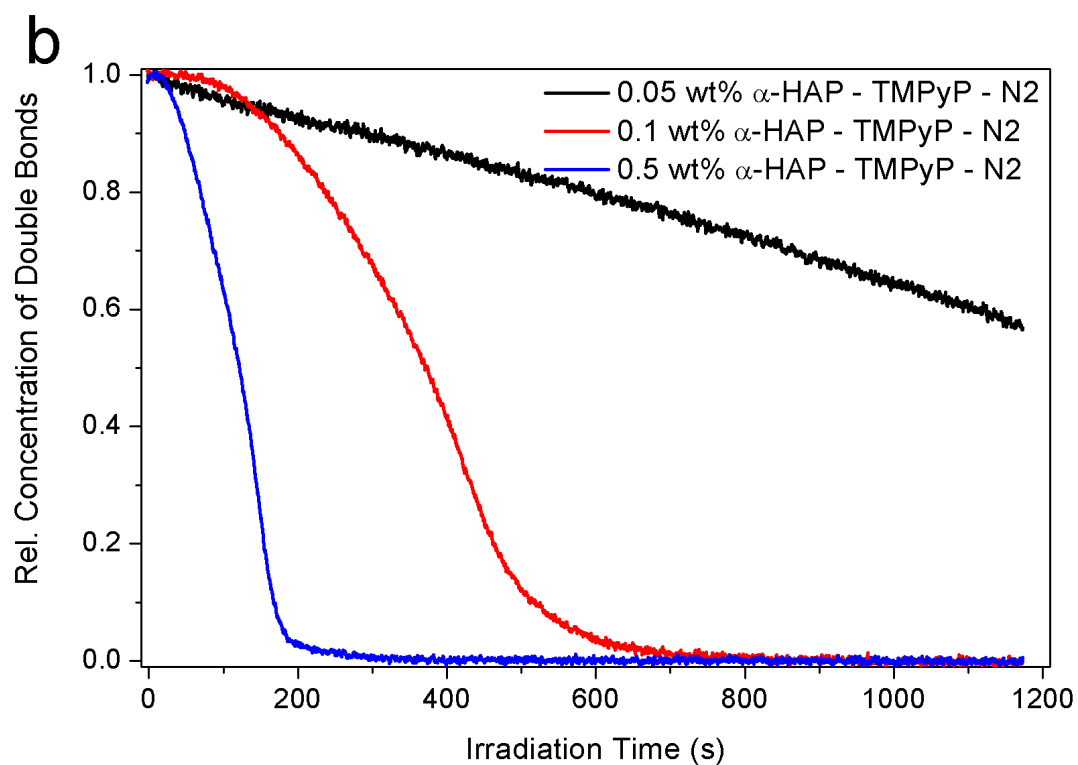

Figure S3: Photopolymerization kinetics of hydrogel formulations using three different  $\alpha$ -HAP concentrations in dye-free formulations (up) and dye-added mixtures (i.e. with 0.01 wt% TMPyP) (down) with nitrogen inertization and at a light intensity of 12 mW cm<sup>-2</sup>.

| [ $\alpha$ -HAP]<br>(wt%)    | 0.05             |                | 0.05   |                | 0.1   |                | 0.1   |                | 0.5   |                | 0.5   |                |
|------------------------------|------------------|----------------|--------|----------------|-------|----------------|-------|----------------|-------|----------------|-------|----------------|
|                              | [TMPyP]<br>(wt%) |                | 0.01   |                | 0     |                | 0.01  |                | 0     |                | 0.01  |                |
| Atmosphere                   | air              | N <sub>2</sub> | air    | N <sub>2</sub> | air   | N <sub>2</sub> | air   | N <sub>2</sub> | air   | N <sub>2</sub> | air   | N <sub>2</sub> |
| Conv. at 300 s (%)           | 97               | 94             | 10     | 11             | 98    | 99             | 23    | 33             | 100   | 100            | 99    | 99             |
| Conv. at 600 s (%)           | 100              | 100            | 18     | 21             | 100   | 100            | 78    | 96             | 100   | 100            | 100   | 100            |
| Final conv. (%)              | 100              | 100            | 37     | 43             | 100   | 100            | 100   | 100            | 100   | 100            | 100   | 100            |
| Induc. time (s)              | 35               | 50             | 65     | 65             | 20    | 15             | 55    | 100            | 5     | 5              | 19    | 26             |
| Max. rate (s <sup>-1</sup> ) | 0.008            | 0.012          | 0.0004 | 0.0004         | 0.014 | 0.020          | 0.002 | 0.003          | 0.033 | 0.053          | 0.012 | 0.010          |

Table S1: Photopolymerization data including final conversions, induction times and maximum reaction rates for all samples measured by RT-FTIR spectroscopy (with and without TMPyP, with three different  $\alpha$ -HAP concentrations and under air or inert atmosphere).

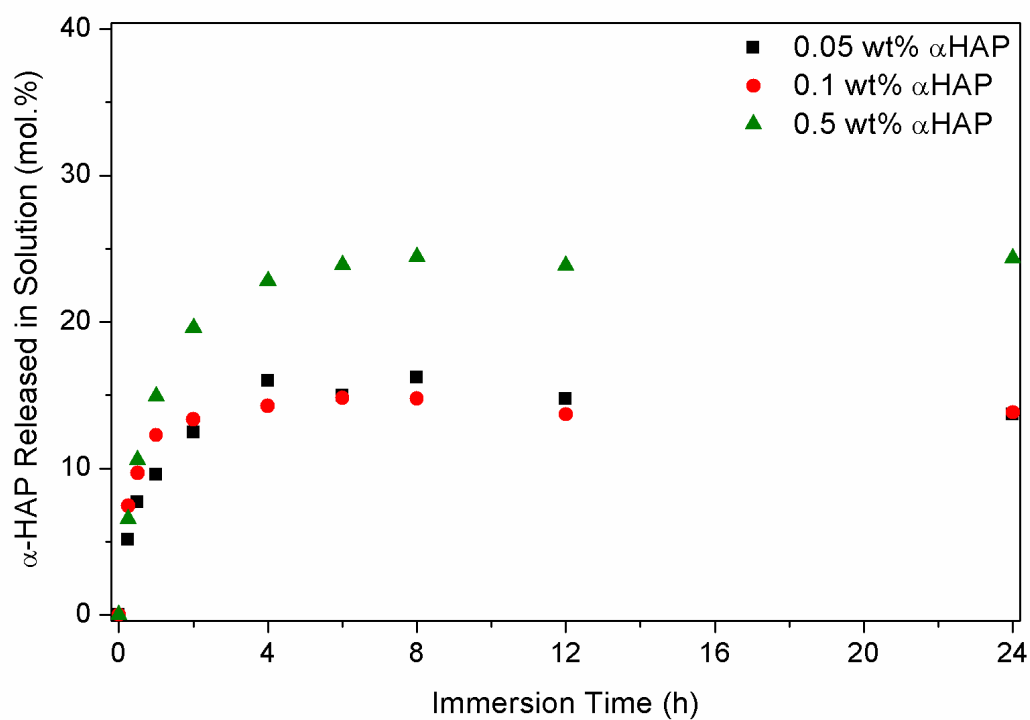

Figure S4: Molar percentages of  $\alpha$ -HAP released into the PBS solution for the three photoinitiator formulations.

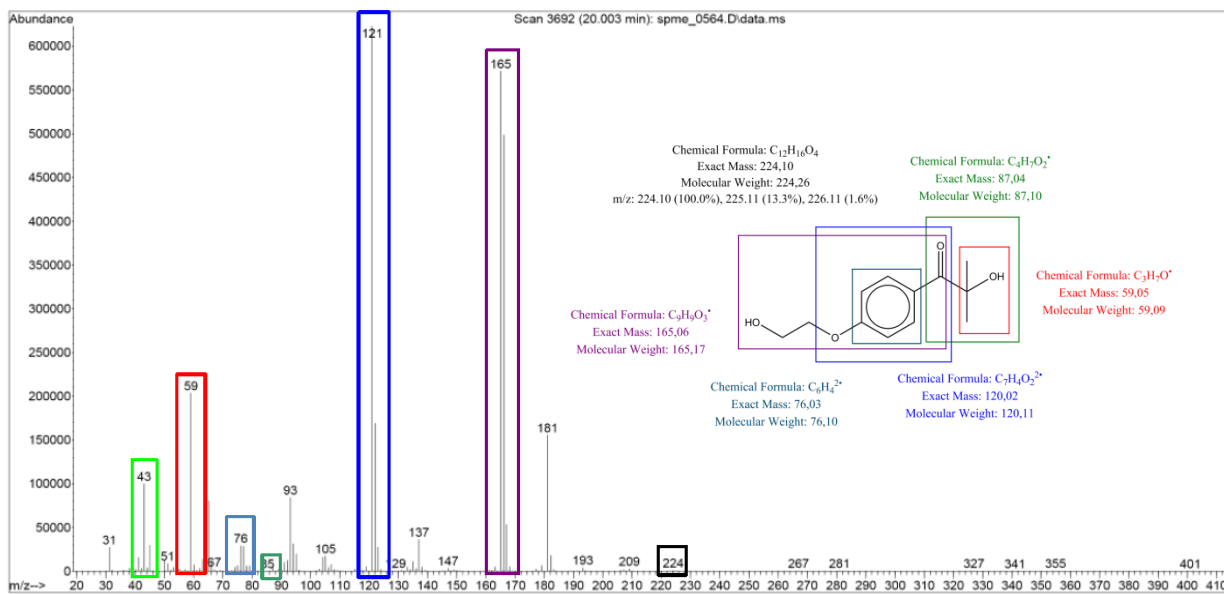

Figure S5: Mass spectrum of 2-Hydroxy-1-[4-(2-hydroxyethoxy) phenyl]-2-methyl-1-propanone and possible cleavage products.

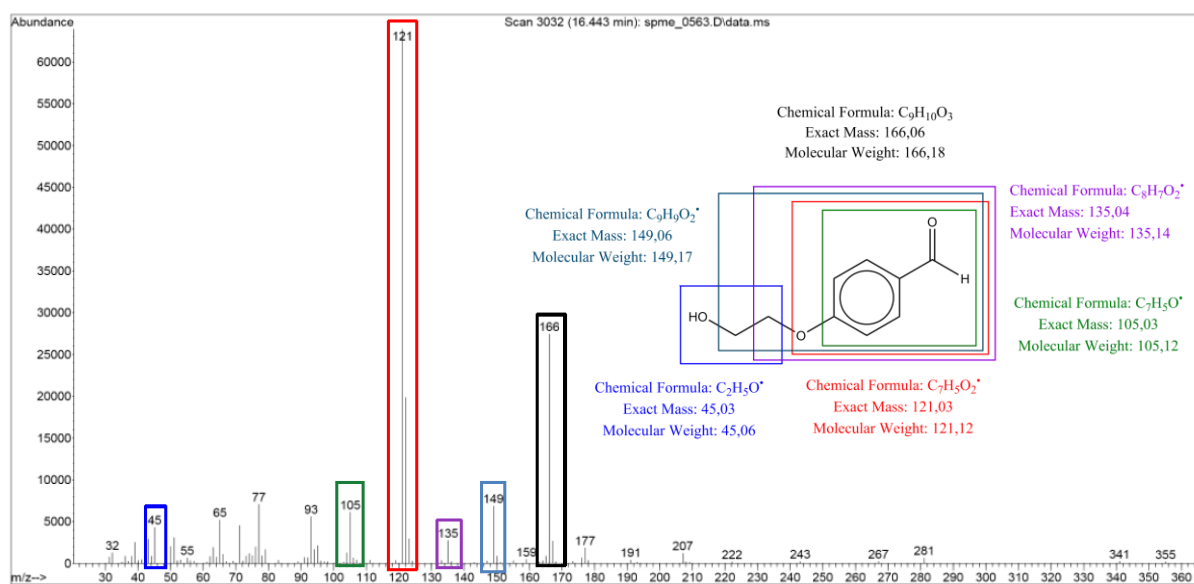

Figure S6: Mass spectrum of the main cleavage product of (4-(2-Hydroxy)ethoxy)benzaldehyde).

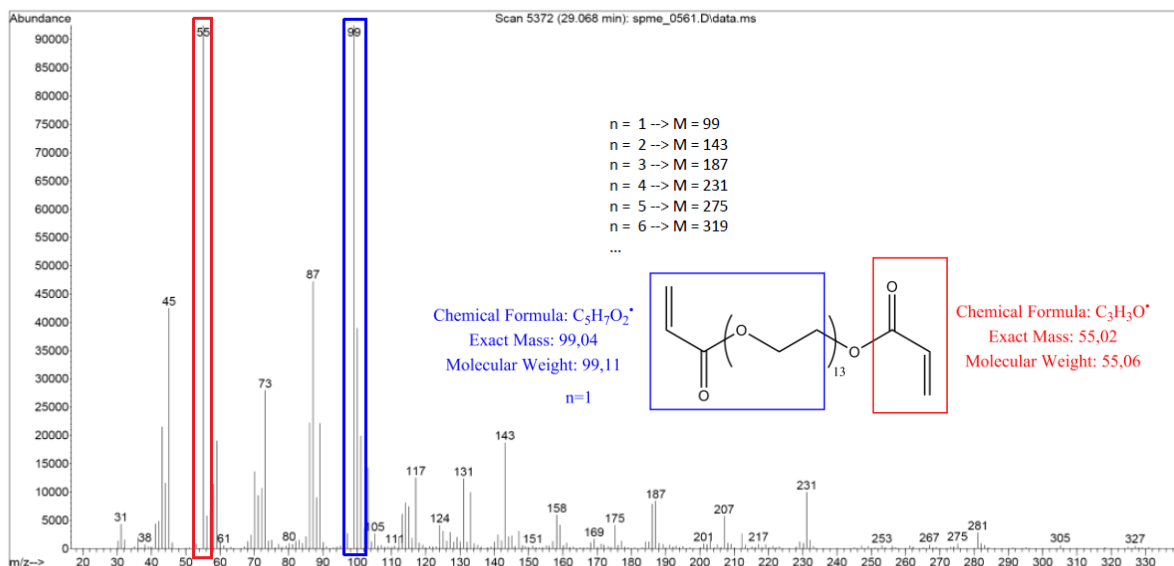

Figure S7: Mass spectrum of PEGDA 700 and its oligomers.

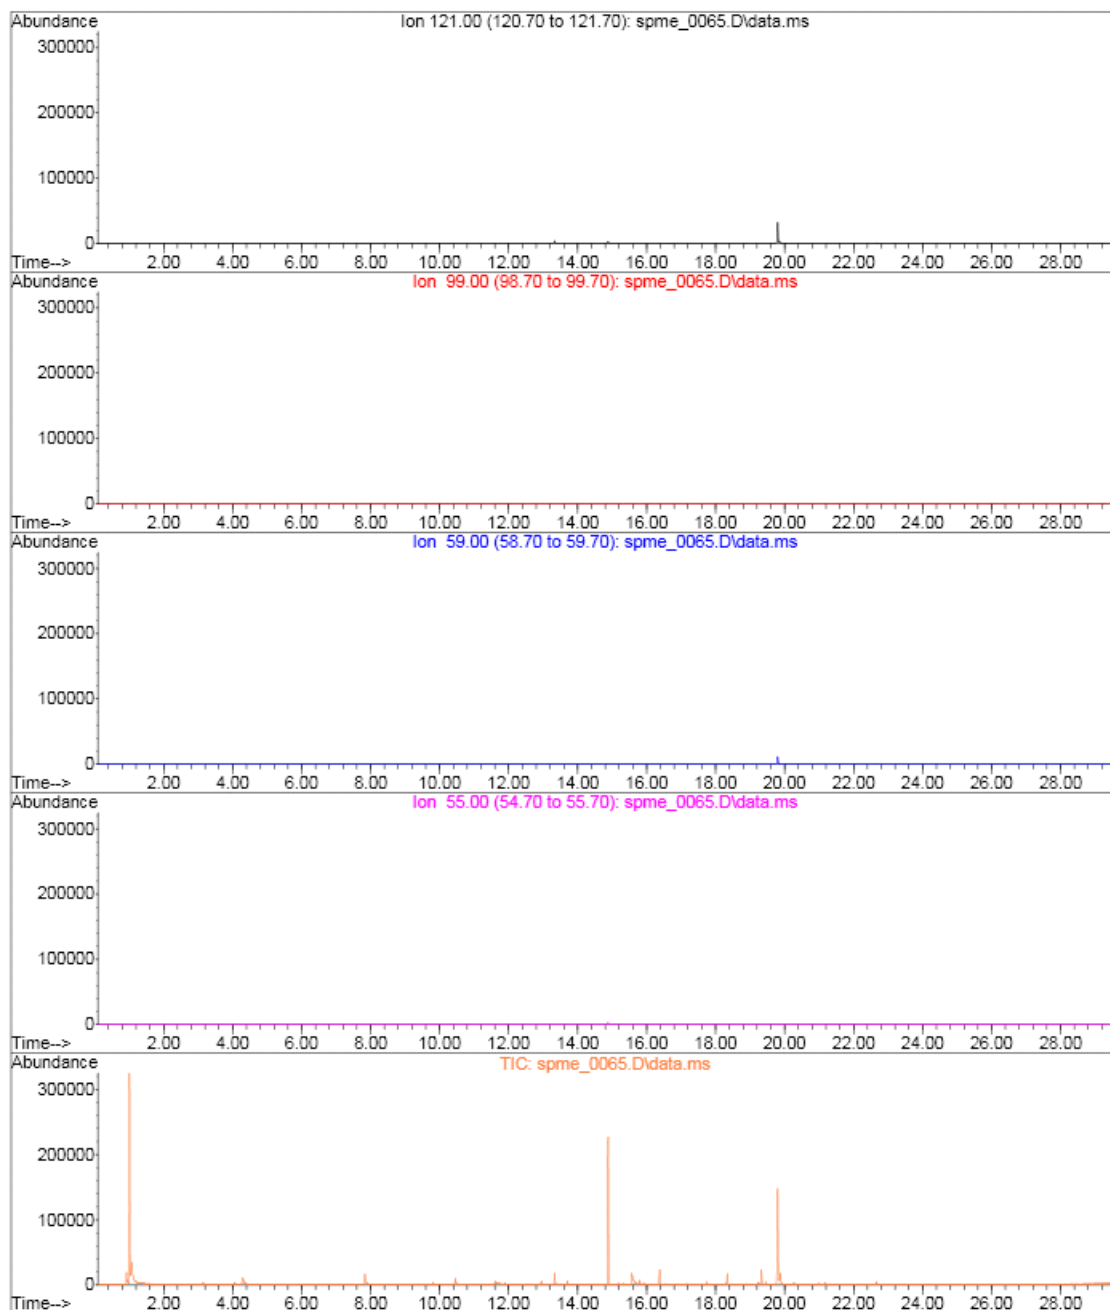

Figure S8: Total ion chromatogram (orange) and selected ion chromatograms at different mass to charge ratios (black  $m/z = 121$ , red  $m/z = 99$ ; blue  $m/z = 59$ , pink  $m/z = 55$ ) of the washing solution after 24 h.

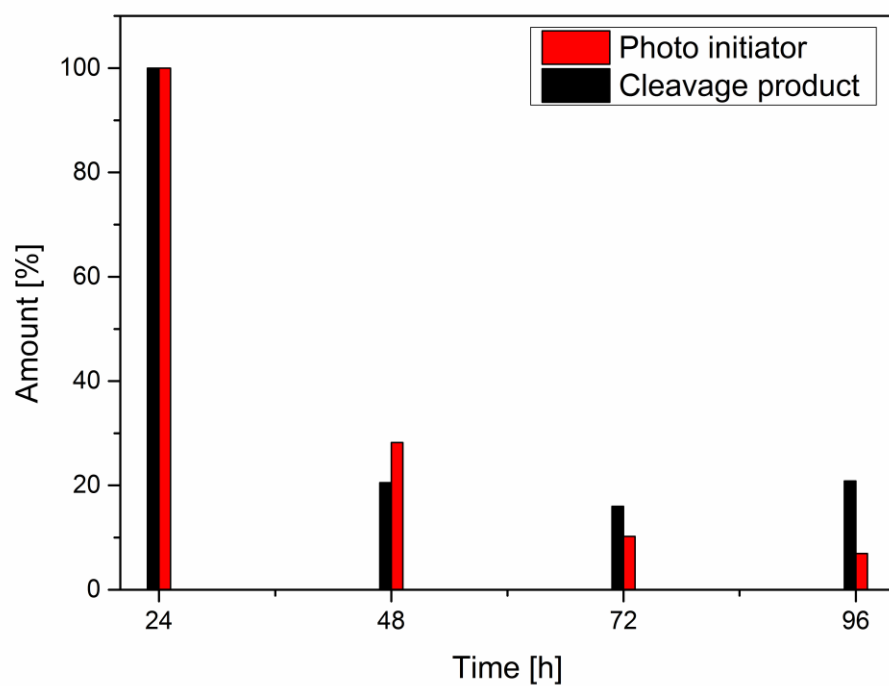

Figure S9: Relative concentration of photoinitiator (red) and photo cleavage product (black) in the washing solutions.
